# Supplementary material for: Isorhamnetin Attenuated the Release of Interleukin‐6 from β‐Amyloid‐Activated Microglia and Mitigated Interleukin‐6‐Mediated Neurotoxicity
Source: Hindawi journal article supplement (doi:10.1155/2022/3652402), 2022-01-01
Supplement: f1 [file 3652402.f1.zip]

**Supplementary information for:**

**Isorhamnetin attenuated the release of interleukin-6 from  $\beta$ -amyloid-activated microglia and mitigated interleukin-6-mediated neurotoxicity**

Pei-Cih Wei<sup>1</sup>, Guey-Jen Lee-Chen<sup>2</sup>, Chiung-Mei Chen<sup>1</sup>, Ying Chen<sup>1</sup>, Yen-Shi Lo<sup>1</sup>,  
Yi-Jing Chen<sup>1</sup>, \*Kuo-Hsuan Chang<sup>1</sup>

<sup>1</sup>Department of Neurology, Chang Gung Memorial Hospital-Linkou Medical Center,  
Chang Gung University School of Medicine, Taoyuan, Taiwan

<sup>2</sup>Department of Life Science, National Taiwan Normal University, Taipei, Taiwan

Correspondence:

\*Kuo-Hsuan Chang, MD., Ph.D.

Phone: 886 (0) 33281200 ext. 5092

Fax: 886 (0) 33288849

E-mail: [gophy5128@cgmh.org.tw](mailto:gophy5128@cgmh.org.tw)

## Supplementary figure legends

### ***Supplementary Fig. 1. Time-response experiments of A $\beta$ oligomers and***

***isorhamnetin in HMC3 cells.*** (A) Treatment with A $\beta$  oligomers (200 nM) for 24 or 48 hours increased IL-6 release, whereas the secretions of IL-1 $\beta$  and TNF- $\alpha$  were not affected by A $\beta$  oligomers. (B) Experimental flowchart. HMC3 cells activated by A $\beta$  were treated with isorhamnetin (10  $\mu$ M) for 24 or 48 hours. (C) In A $\beta$ -activated HMC3 cells, treatment with isorhamnetin for 24 hours did not reduce the secretion of IL-6, while 48 hours treatment reduced the IL-6 secretion to baseline. Data were analyzed using one-way ANOVA with Bonferroni's post hoc test (\* $P$  < 0.05, \*\* $P$  < 0.01 [control vs. A $\beta$ ]; ## $P$  < 0.05 [A $\beta$  vs. A $\beta$  /ISN],  $n$  = 3; means  $\pm$  SEM). A $\beta$ : A $\beta$  oligomers; ISN: isorhamnetin.

### ***Supplementary Fig. 2. NF- $\kappa$ B inhibitor suppressed the A $\beta$ -induced activation of***

***HMC3 cells.*** (A) Western blot in HMC3 cells treated with A $\beta$  oligomers (200 nM) or EVP4593 (NF- $\kappa$ B inhibitor, 1  $\mu$ M). Treatment with EVP4593 for 48 hours reduced phosphorylation of NF- $\kappa$ B (B), the expression of CD11b (C), CD68 (D), IBA1(E), and IL-6 secretion (F). Data were analyzed using one-way ANOVA with Bonferroni's post hoc test or Student's  $t$  test (\* $P$  < 0.05, \*\* $P$  < 0.01, \*\*\* $P$  < 0.001 [control vs. A $\beta$ ]; # $P$  < 0.05, ## $P$  < 0.01, ### $P$  < 0.001 [A $\beta$  vs. A $\beta$ /EVP4593],  $n$  = 3; means  $\pm$  SEM). A $\beta$ : A $\beta$  oligomers; EVP4593: NF- $\kappa$ B inhibitor.

### ***Supplementary Fig. 3. IL-6 IgG neutralized the effect of HMC3 activated-***

***conditional medium in SH-SY5Y-derived neurons.*** (A-B) IL-6 IgG (5 ng/ml for 48 hours) reduced the expression cleaved caspase 3 in SH-SY5Y-derived neurons treated with HMC3-conditioned medium. (C-D) IL-6 IgG reduced ROS production in SH-SY5Y-derived neurons treated with HMC3-conditioned medium. (E) The impaired

neurite outgrowth by HMC3 conditioned medium was rescued by IL-6 neutralizing antibody. Images were measured using MetaMorph software. Scale bar, 25 $\mu$ m. Data were analyzed using one-way ANOVA with Bonferroni's post hoc test (\* $P < 0.05$ , \*\*\* $P < 0.001$  [control vs. HMC3 C.M; control vs. HMC3 C.M/IL-6 IgG]; # $P < 0.05$  [HMC3 C.M vs. HMC3 C.M/IL-6 IgG],  $n = 3$ ; means  $\pm$  SEM). HMC3 C.M: HMC3-conditioned medium; IL-6 IgG: IL-6 neutralized antibody.

***Supplementary Fig. 4. TYK2 inhibitor suppressed IL-6 or HMC3 conditioned medium induced apoptosis in SH-SY5Y-derived neurons.*** (A-B) In SH-SY5Y-derived neurons, the upregulation of cleaved caspase 3 by IL-6 (350 pg/mL) or HMC3 conditioned medium was counteracted by treatment with TYK2 inhibitor (1  $\mu$ M) for 48 hours. Data were analyzed using one-way ANOVA with Bonferroni's post hoc test (\*\* $P < 0.01$ , \*\*\* $P < 0.001$  [control vs. IL-6; control vs. HMC3 C.M]; # $P < 0.05$  [IL-6 vs. IL-6/TYK2 inhibitor]; \*\*\* $P < 0.001$  [HMC3 C.M vs. HMC3 C.M/TYK2 inhibitor],  $n = 3$ ; means  $\pm$  SEM). HMC3 C.M: HMC3 activated-conditioned medium.
