# Supplementary figures and images for: Isorhamnetin Attenuated the Release of Interleukin‐6 from β‐Amyloid‐Activated Microglia and Mitigated Interleukin‐6‐Mediated Neurotoxicity
Source: Hindawi journal article supplement (doi:10.1155/2022/3652402), 2022-01-01

A.

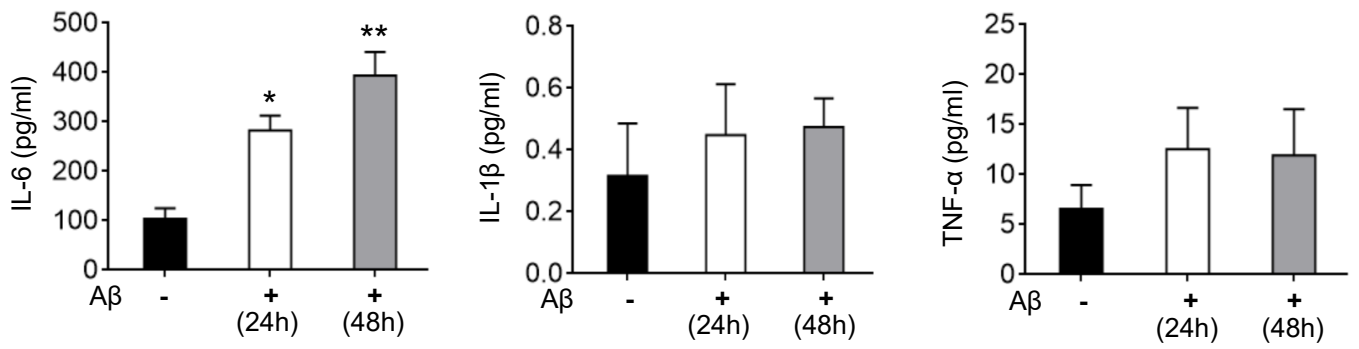

B.

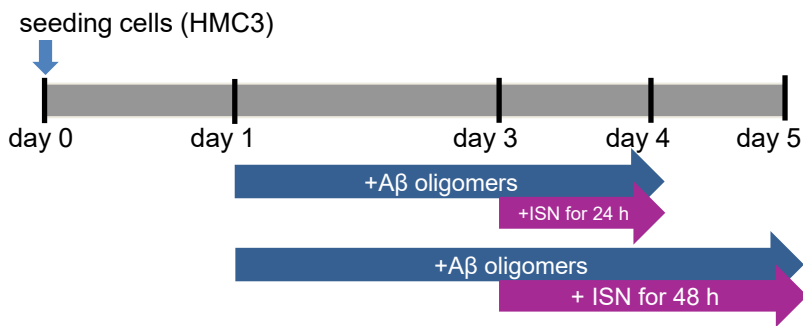

C.

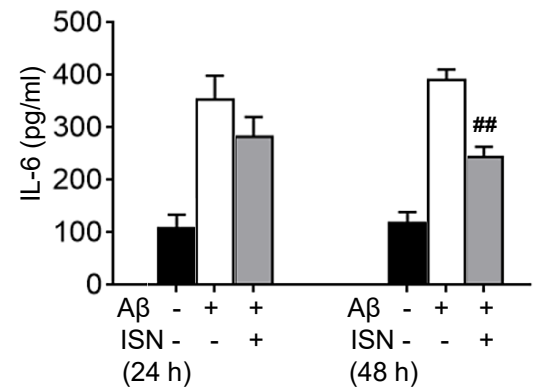

Supplement: f1 [file 3652402.f1.zip]

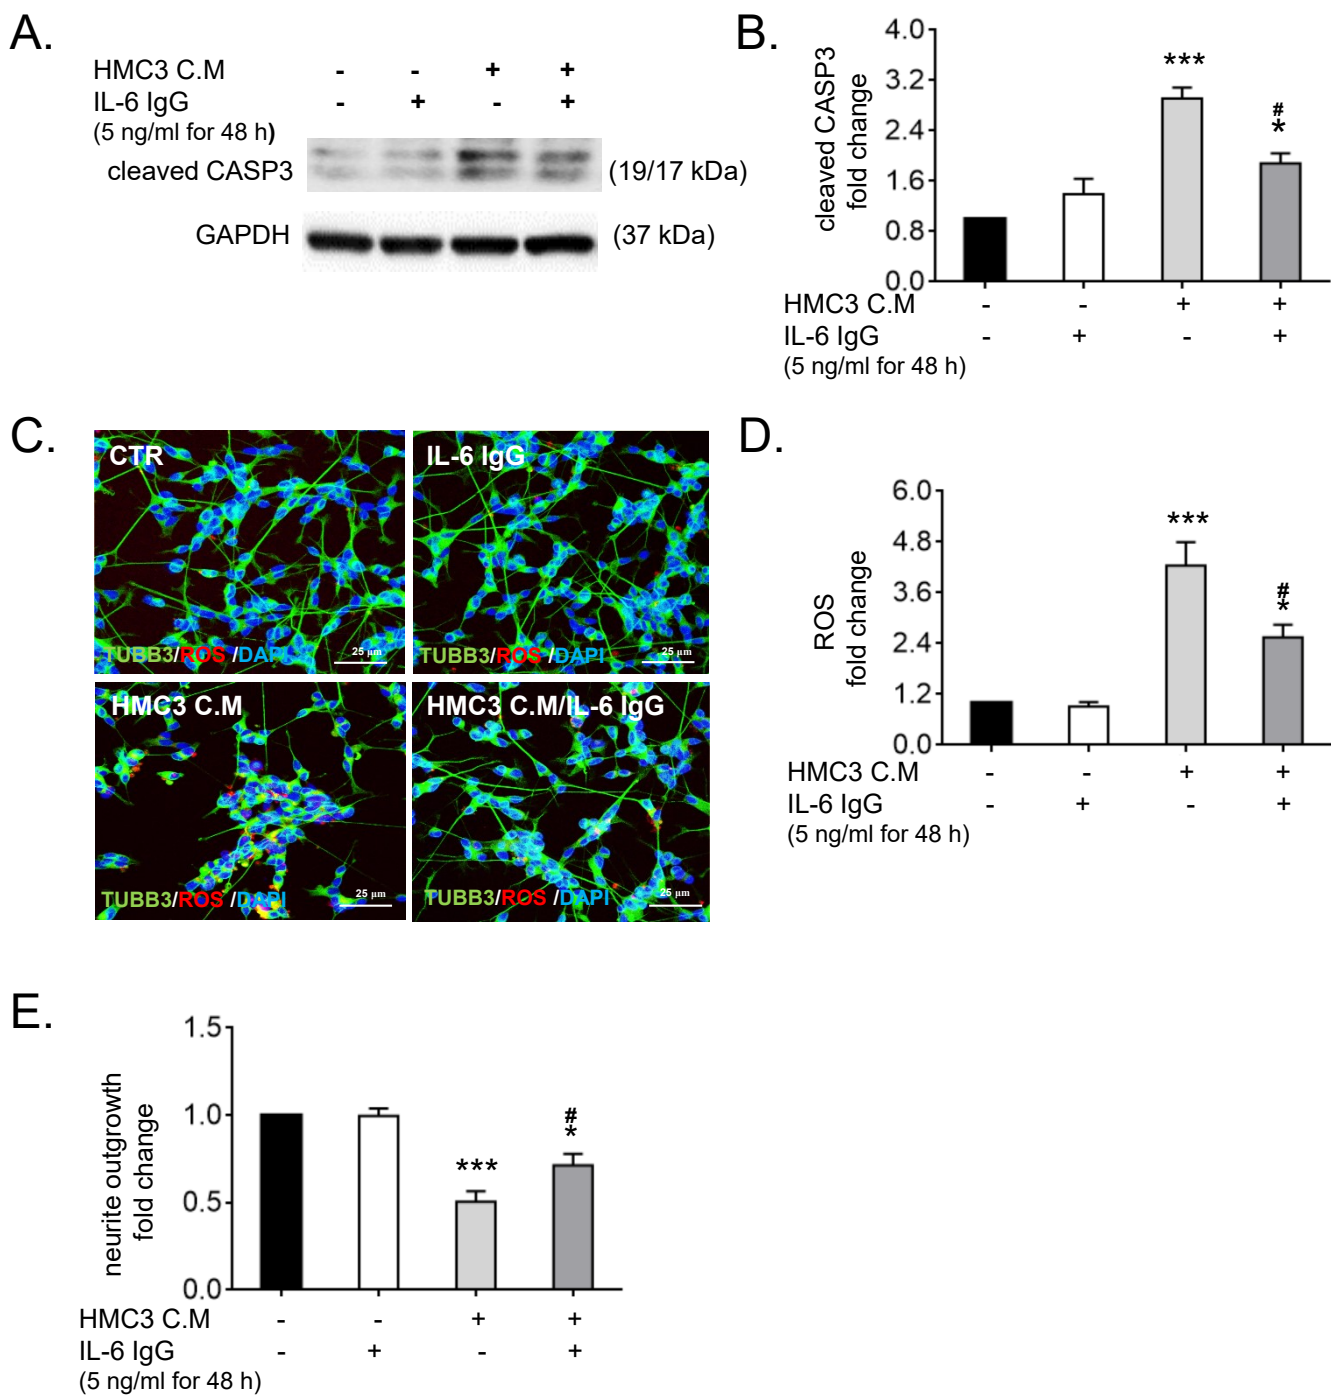

Supplement: f1 [file 3652402.f1.zip]

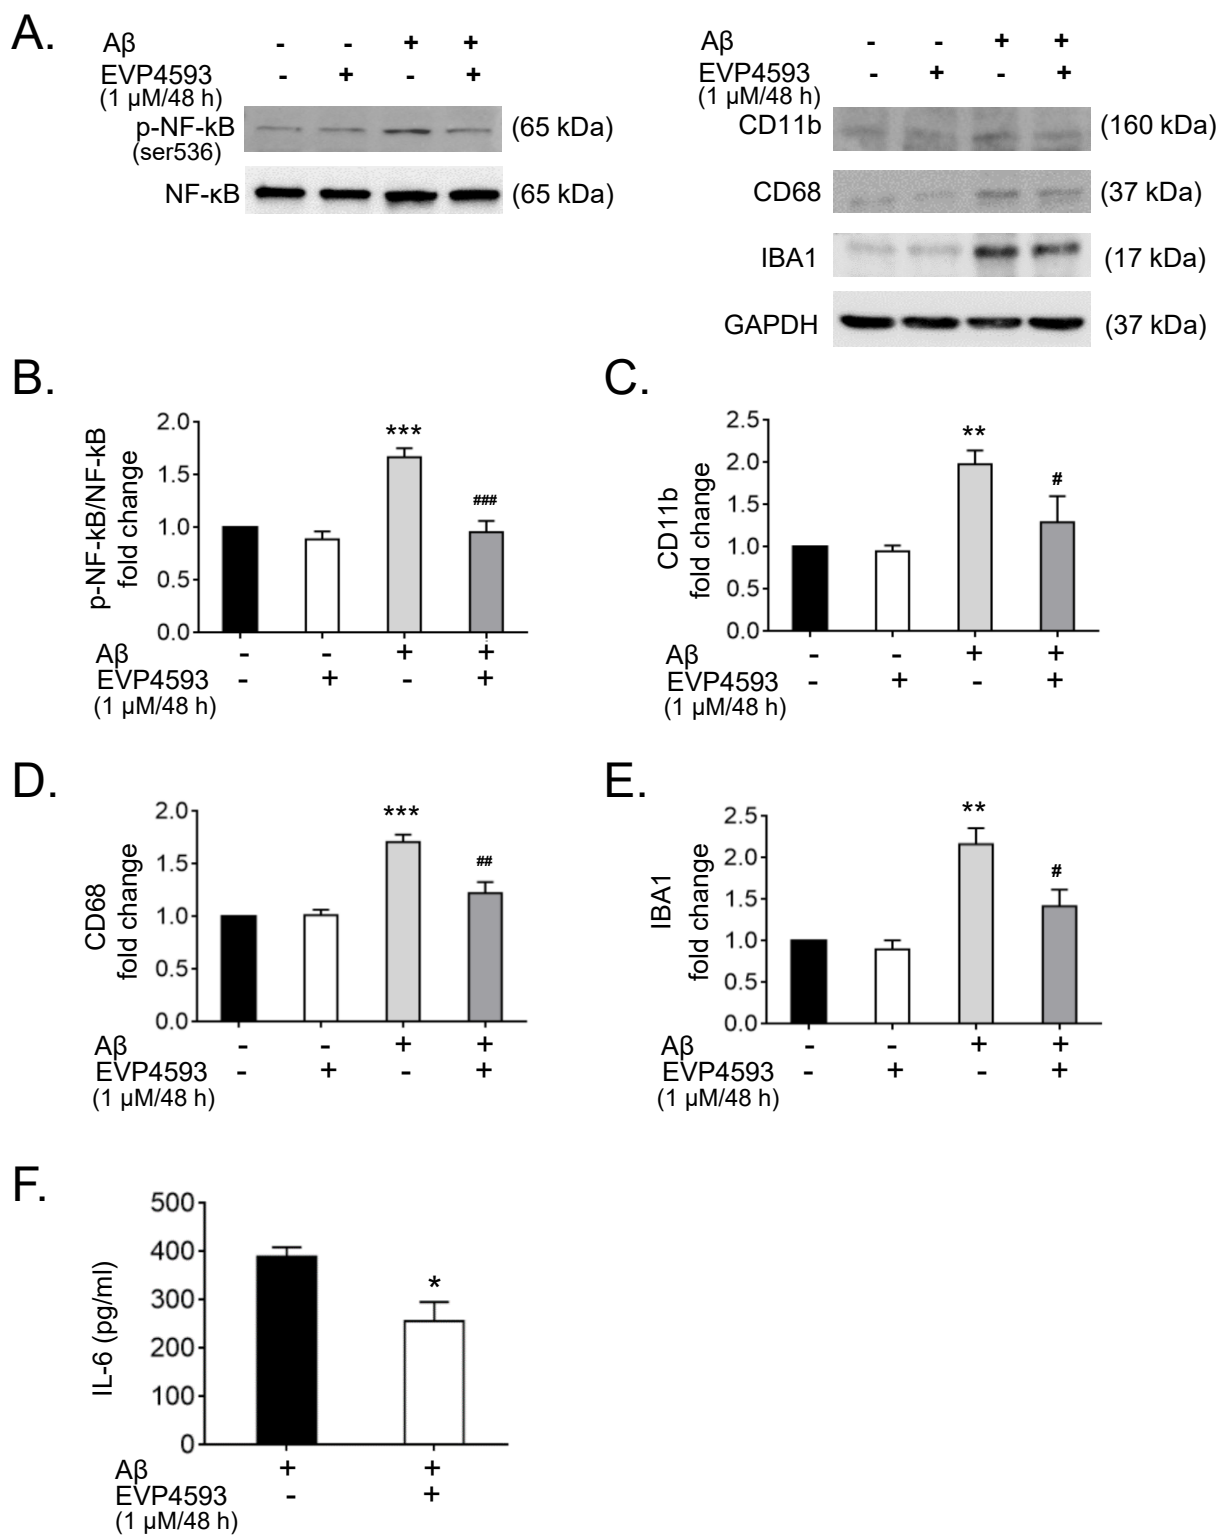

Supplement: f1 [file 3652402.f1.zip]

A.

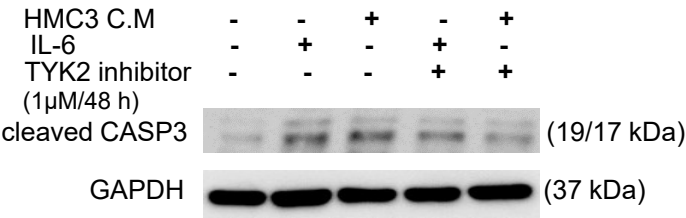

B.

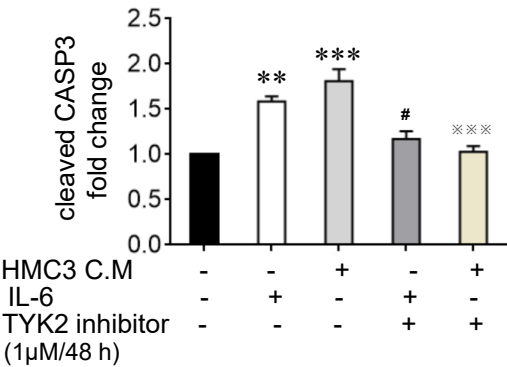

Supplement: f1 [file 3652402.f1.zip]
